# Supplementary material for: Overexpression of BRCA1 in Neural Stem Cells Enhances Cell Survival and Functional Recovery after Transplantation into Experimental Ischemic Stroke
Source: Oxid Med Cell Longev. 2019 Apr 3;2019:8739730. doi: 10.1155/2019/8739730 (PMC6470423; doi:10.1155/2019/8739730)
Supplement: Supplementary Materials — Figure S1: (A) Immunofluorescence identification of NSCs with anti-Nestin. (B) Fluorescence images of differentiation-induced NSCs stained with anti-βIII tubulin (neuron marker), anti-GFAP (astrocyte marker), or anti-CNPase (oligodendrocyte marker). Scale bar: 50 μm. Figure S2: Transfection efficiency of LV-BRCA1 was detected in NSCs. (A, B) GFP-positive transfected NSCs in the LV-GFP and LV-BRCA1 group with quantification. (B) Western blot and quantitative analysis of BRCA1 expression 72 h after transfection. Data are expressed as mean ± SD; n = 5. ∗∗∗ p < 0.001 vs. the control group. [file 8739730.f1.pdf]

**Overexpression of BRCA1 in neural stem cells enhances cell survival and functional recovery after transplantation into experimental ischemic stroke**

Pengfei Xu<sup>a,#</sup>, Xiaolei Shi<sup>b,c,#</sup>, Xiaohao Zhang<sup>d,#</sup>, Qian Liu<sup>a</sup>, Yi Xie<sup>a</sup>, Ye Hong<sup>a</sup>, Juanji Li<sup>a</sup>, Mengna Peng<sup>a</sup>, Xinfeng Liu<sup>a</sup>, Gelin Xu<sup>a</sup>

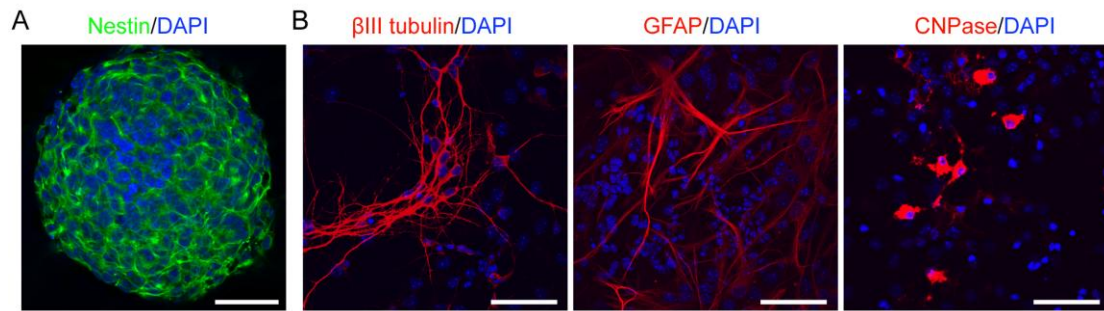

**Figure S1** (A) Immunofluorescence identification of NSCs with anti-Nestin. (B) Fluorescence images of differentiation-induced NSCs stained with anti-βIII tubulin (neuron marker), anti-GFAP (astrocyte marker), or anti-CNPase (oligodendrocyte marker). Scale bar: 50 μm.

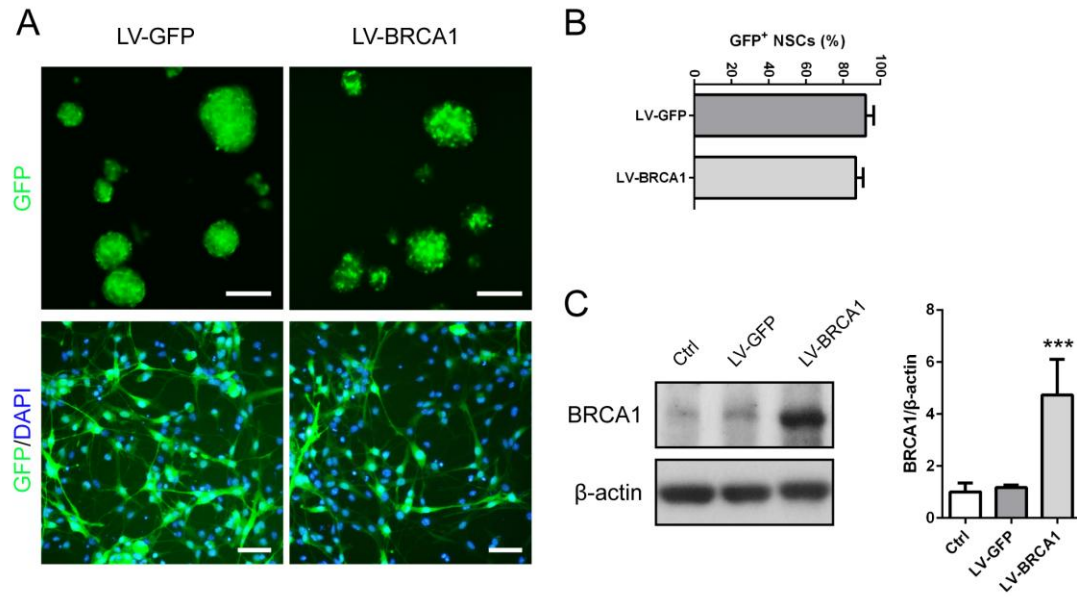

**Figure S2** Transfection efficiency of LV-BRCA1 was detected in NSCs.

(A, B) GFP-positive transfected NSCs in LV-GFP and LV-BRCA1 group with quantification. (B) Western blot and quantitative analysis of BRCA1 72 h after transfection. Data are expressed as mean  $\pm$  SD; n = 5. \*\*\* $p$  < 0.001 vs control group.
